# Supplementary material for: The clinical significance of small copy number variants in neurodevelopmental disorders
Source: PubMed Central journal article supplement — J Med Genet. 2014 Aug 8;51(10):677–88. doi: 10.1136/jmedgenet-2014-102588 (PMC4173859; doi:10.1136/jmedgenet-2014-102588), 2014-08-08
Supplement: jmedgenet-2014-102588-s1.pdf [file jmedgenet-2014-102588-s1.pdf]

## Supplementary Data

### **The clinical significance of small copy number variants in neuro-developmental disorders**

Reza Asadollahi<sup>1</sup>, Beatrice Oneda<sup>1</sup>, Pascal Joset<sup>1</sup>, Silvia Azzarello-Burri<sup>1</sup>, Deborah Bartholdi<sup>1</sup>, Katharina Steindl<sup>1</sup>, Marie Vincent<sup>1</sup>, Joana Cobilanschi<sup>1</sup>, Heinrich Sticht<sup>2</sup>, Rosa Baldinger<sup>1</sup>, Regina Reissmann<sup>1</sup>, Irene Sudholt<sup>1</sup>, Christian T Thiel<sup>3</sup>, Arif B Ekici<sup>3</sup>, André Reis<sup>3</sup>, Emilia K Bijlsma<sup>4</sup>, Joris Andrieux<sup>5</sup>, Anne Dieux<sup>6</sup>, David FitzPatrick<sup>7</sup>, Susanne Ritter<sup>8</sup>, Alessandra Baumer<sup>1</sup>, Beatrice Latal<sup>8</sup>, Barbara Plecko<sup>9</sup>, Oskar G Jenni<sup>8</sup>, Anita Rauch<sup>1</sup>

<sup>1</sup> Institute of Medical Genetics, University of Zurich, Zurich, Switzerland

<sup>2</sup> Biochemistry Department, University of Erlangen-Nuremberg, Erlangen, Germany

<sup>3</sup> Institute of Human Genetics, University of Erlangen-Nuremberg, Erlangen, Germany

<sup>4</sup> Department of Clinical Genetics, Leiden University Medical Center (LUMC), Leiden, The Netherlands

<sup>5</sup> Institut de Génétique Médicale, Hôpital Jeanne de Flandre, CHRU de Lille, Lille, France

<sup>6</sup> Clinique de Génétique Guy Fontaine, Hôpital Jeanne de Flandre, CHRU de Lille, Lille, France

<sup>7</sup> MRC Human Genetics Unit, MRC Institute for Genetic and Molecular Medicine, University of Edinburgh EH4 2XU, UK

<sup>8</sup> Child Development Center, University Children's Hospital Zurich, Zurich, Switzerland

<sup>9</sup> Division of Child Neurology, University Children's Hospital Zurich, Zurich, Switzerland

**Supplementary Table 1. List of all CNVs <500 kb detected in 714 patients with Affymetrix high resolution arrays**

| Patient ID | Gender | CNV        | Chr | Band   | hg, chr:start-end           | Size (kbp) | Confidence value (%) | Marker count | Affected gene(s) | MLPA target (s)   | MLPA result | Inheritance    | Pathogenicity            | Affymetrix array | Remarks                                                                                                                                                                                                                                                                                                                                        |
|------------|--------|------------|-----|--------|-----------------------------|------------|----------------------|--------------|------------------|-------------------|-------------|----------------|--------------------------|------------------|------------------------------------------------------------------------------------------------------------------------------------------------------------------------------------------------------------------------------------------------------------------------------------------------------------------------------------------------|
| 59484      | M      | Del        | 4   | q12    | hg18, 4:52554386-52556739   | 2          | 96                   | 7            | LRRC66           | LRRC66 e4         | Confirmed   | Paternal       | no evidene               | 2.7              |                                                                                                                                                                                                                                                                                                                                                |
| 61587      | M      | Del        | 2   | q31.1  | hg18, 2:170957153-170959604 | 2          | 96                   | 6            | MYO3B            | MYO3B e15, e16    | Confirmed   | Paternal       | no evidene               | 2.7              |                                                                                                                                                                                                                                                                                                                                                |
| 60984      | F      | Del        | 16  | p12.1  | hg18, 16:24793142-24797112  | 4          | 96                   | 6            | SLC5A11          | SLC5A11 e6, e7    | Confirmed   | Maternal       | no evidene               | 2.7              | Sanger sequencing of the gene was negative. SLC5A11 is a cotransporter. Cotransporters represent a major class of proteins that make use of ion gradients to drive active transport for the cellular accumulation of nutrients, neurotransmitters, osmolytes, and ions. Many members of this protein family are involved in genetic disorders. |
| 617        | F      | Del        | 17  | p13.3  | hg18, 17:2519114-2523280    | 4          | 96                   | 6            | <b>PAFAH1B1</b>  | PAFAH1B1 e6, e7   | Confirmed   | Parents N/A    | <b>Pathogenic</b>        | 2.7              | PAFAH1B1 is OMIM gene for incomplete lissencephaly.                                                                                                                                                                                                                                                                                            |
| 9229       | M      | Del (homo) | 1   | p36.31 | hg18, 1:6361008-6368114     | 7          | 98                   | 8            | <b>ACOT7</b>     | ACOT7 e1, i1-2    | Confirmed   | Parental (het) | <b>Likely pathogenic</b> | 2.7              | He is the only child in the family with homozygous deletion and is the only affected. Details are available in the description of the patient.                                                                                                                                                                                                 |
| 58822      | M      | Del        | 7   | q11.22 | hg18, 7:69233202-69240841   | 8          | 93                   | 16           | <b>AUTS2</b>     | AUTS2 i3-4, e4    | Confirmed   | Paternal       | <b>Pathogenic</b>        | 2.7              | Father is affected. Sanger sequencing of the gene was negative. Microdeletions of the gene in patients with variable neurodevelopmental features have been reported.                                                                                                                                                                           |
| 68629      | M      | Del        | 11  | q13.4  | hg19, 11:74569938-74579385  | 9          | 92                   | 19           | XRRA1            | XRRA1 i11-12, e12 | Confirmed   | Maternal       | no evidene               | Cytoscan         |                                                                                                                                                                                                                                                                                                                                                |
| 61825      | F      | Del        | 19  | q13.11 | hg18, 19:39379364-39389949  | 11         | 92                   | 14           | LSM14A           | LSM14A e3, i3-4   | Confirmed   | Paternal       | no evidene               | 2.7              |                                                                                                                                                                                                                                                                                                                                                |
| 62610      | M      | Del        | 2   | p16.2  | hg18, 2:54411976-54424374   | 12         | 91                   | 9            | C2orf73          | C2orf73 e2, e3    | Confirmed   | Paternal       | no evidene               | 2.7              | Only exon 2 of C2orf73 was deleted.                                                                                                                                                                                                                                                                                                            |

|       |   |     |    |        |                              |    |    |    |                     |                                |           |                |                   |          |                                                                                                                                                                                                                                                                                                                                                                                                                                                                              |
|-------|---|-----|----|--------|------------------------------|----|----|----|---------------------|--------------------------------|-----------|----------------|-------------------|----------|------------------------------------------------------------------------------------------------------------------------------------------------------------------------------------------------------------------------------------------------------------------------------------------------------------------------------------------------------------------------------------------------------------------------------------------------------------------------------|
| 62611 | F | Del | 4  | q22.1  | hg18, 4:88438703-88452522    | 13 | 90 | 14 | HSD17B13            | HSD17B13 i6-7, e7              | Confirmed | Paternal       | Likely benign     | 2.7      | Heterozygous de novo mutation in SCN2A: c.4025T>C (p.L1342P) was found in this patient. There are DGV variations 30208 (2/485 ctls, Jakobsson 2008), 51479 (3/2026 ctls, Shaikh 2009) and 36311 (1/1 ctl, Kidd 2008) with deletions encompassing some other exon(s) of HSD17B13.                                                                                                                                                                                             |
| 56366 | F | Del | 12 | q24.21 | hg18, 12:115158648-115175505 | 17 | 87 | 18 | <b>MED13L</b>       | MED13L i1-2, e2                | Confirmed | <i>de novo</i> | <b>Pathogenic</b> | 2.7      | Sanger sequencing of the gene was negative. Whole-exome sequencing showed no evidence for a non-allelic second hit. This patient and further cases were described elsewhere (EJHG 2013).                                                                                                                                                                                                                                                                                     |
| 45333 | M | Del | 20 | q13.32 | hg19, 20:57556968-57575495   | 19 | 94 | 28 | TH1L (NELFCD), CTSZ | TH1L (NELFCD) e2, e10; CTSZ e5 | Confirmed | <i>de novo</i> | Likely benign     | Cytoscan | Pathogenic mosaic heterozygous mutation in PIK3CA: c.2740G>A (p.G914R) was found in the patient by whole-exome sequencing.                                                                                                                                                                                                                                                                                                                                                   |
| 68738 | M | Del | 7  | q35    | hg19, 7:144509480-144534911  | 25 | 93 | 35 | TPK1                | TPK1 i1-2, i2-3                | Confirmed | Father N/A     | VOUS              | Cytoscan | This deletion was absent in the mother and a healthy sister but present in the likewise affected sister. Father's DNA was not available. Sanger sequencing of the gene in available samples was negative. TPK1 encodes thiamin pyrophosphokinase 1 which catalyzes the conversion of thiamine to thiamine pyrophosphate. It is expressed in brain, and a de novo missense mutation of TPK1 has been reported in an autism cohort using WES by Sanders et al.                 |
| 31553 | M | Del | 21 | q22.3  | hg18, 21:43169759-43201708   | 32 | 92 | 22 | NDUFV3, WDR4        | NDUFV3 e3                      | Confirmed | Paternal       | VOUS              | 2.7      | Sanger sequencing of the gene was negative. A de novo missense mutation of WDR4 has been reported in an autism cohort using WES and mutations of NDUFV3 have been reported in complex I deficiency. WDR4 is a candidate for some disorders mapped to 21q22.3 as well as for the development of Down syndrome phenotypes. NDUFV3 encodes NADH dehydrogenase (ubiquinone) flavoprotein 3 which is one of the subunits that make up the NADH-ubiquinone oxidoreductase complex. |

|                       |          |            |    |               |                              |     |    |     |                                |                              |                  |                |                   |          |                                                                                                                                                                                  |
|-----------------------|----------|------------|----|---------------|------------------------------|-----|----|-----|--------------------------------|------------------------------|------------------|----------------|-------------------|----------|----------------------------------------------------------------------------------------------------------------------------------------------------------------------------------|
| 70886                 | M        | Dup        | 2  | q33.1         | hg19, 2:200278502-200310272  | 32  | 89 | 68  | <b>SATB2</b>                   | SATB2 i3-4, e4               | Confirmed        | <i>de novo</i> | <b>Pathogenic</b> | Cytoscan | Deletions and truncating mutations of SATB2 have been implicated as causative for cleft palate and ID.                                                                           |
| 64035                 | M        | Del        | 8  | q24.3         | hg18, 8:141650841-141693661  | 43  | 92 | 43  | EIF2C2 (AGO2)                  | EIF2C2 (AGO2) e2, e3         | Confirmed        | Maternal       | no evidene        | 2.7      |                                                                                                                                                                                  |
| 60407 & 66928 & 60324 | F (all ) | Del        | 4  | q12           | hg18, 4:52579180-52624947    | 46  | 94 | 52  | SGCB, SPATA18                  | SGCB e2; SPATA18 e4          | Confirmed in all | Maternal       | no evidene        | 2.7      | They are triplet. Exome sequencing did not reveal any obvious Mendelian cause.                                                                                                   |
| 43552                 | M        | Del        | 16 | p13.3         | hg18, 16:4986264-5046682     | 60  | 89 | 53  | NAGPA, C16orf89, SEC14L5       | NAGPA e4, SEC14L5 e12        | Confirmed        | <i>de novo</i> | VOUS              | 2.7      | A smaller deletion including only SEC14L5 and NAGPA is present in 1/1038 of a world wide control cohort by Affymetrix.                                                           |
| 63660                 | M        | Del        | 12 | q24.31        | hg18, 12:120240193-120307177 | 67  | 88 | 45  | ANAPC5                         | ANAPC5 e4, e10               | Confirmed        | Maternal       | no evidene        | 2.7      |                                                                                                                                                                                  |
| 70229                 | M        | Del        | 12 | q24.33        | hg19, 12:132552537-132623611 | 71  | 90 | 48  | EP400, EP400NL, DDX51          | EP400 e51, EP400NL e3        | Confirmed        | <i>de novo</i> | VOUS              | Cytoscan | There is patient 262376 in Decipher database with a duplication of unknown inheritance encompassing the same genes.                                                              |
| 62915                 | F        | Del        | X  | p22.2         | hg18, X:16531546-16605488    | 73  | 91 | 57  | S100G, CTPS2                   | CTPS2 e11, e12, e16          | Confirmed        | Maternal       | no evidene        | 2.7      |                                                                                                                                                                                  |
| 50286 & 53032         | F & M    | Del (homo) | 2  | p21           | hg18, 2:44435674-44519612    | 83  | 99 | 93  | <b>PREPL, C2orf34 (CAMKMT)</b> | PREPL e1, C2orf34 e1, e2, e3 | Confirmed        | Parental (het) | <b>Pathogenic</b> | 2.7      | Two siblings were affected. It is overlapping hypotonia-cystinuria syndrome. These patients are described elsewhere (AJMG 2013).                                                 |
| 54949                 | M        | Del        | 6  | q26           | hg18, 6:162072914-162156999  | 84  | 92 | 93  | PARK2                          | N/A                          | array in parents | Maternal       | VOUS              | 2.7      | This deletion was within PARK2. CNVs of PARK2 have been shown by Glessner et al. 2009 and Girirajan et al. 2013 to be significantly enriched in ASD cases versus controls.       |
| 72125                 | F        | Dup        | 10 | p14           | hg19, 10:7932363-8033508     | 101 | 90 | 108 | TAF3                           | TAF3 e3                      | Confirmed        | <i>de novo</i> | VOUS              | Cytoscan | TAF3 encodes TAF3 RNA polymerase II, TATA box binding protein (TBP)-associated factor. TAFs contribute to promoter recognition and selectivity and act as antiapoptotic factors. |
| 62563                 | F        | Del        | 5  | p15.2         | hg18, 5:11431816-11545236    | 113 | NA | 99  | <b>CTNND2</b>                  | CTNND2 e5, e6                | Confirmed        | <i>de novo</i> | <b>Pathogenic</b> | 6.0      | Sanger sequencing of the gene was negative. CTNND2 is implicated in the ID phenotype of cri-du-chat syndrome. Further patients are discussed in this paper.                      |
| 60045                 | M        | Dup        | 7  | q36.1         | hg18, 7:148278728-148391821  | 113 | 89 | 60  | PDIA4                          | PDIA4 e7, e8                 | Confirmed        | Paternal       | no evidene        | 2.7      |                                                                                                                                                                                  |
| 45679                 | M        | Dup        | 20 | q11.21-q11.22 | hg18, 20:31442246-31556613   | 114 | 88 | 72  | SNTA1, CDK5RAP1, CBFA2T2       | SNTA1 e2, e4                 | Confirmed        | Paternal       | no evidene        | 2.7      |                                                                                                                                                                                  |

|       |   |     |     |        |                              |     |    |     |                         |                         |                  |                |                   |          |                                                                                                                                                                                                                                                                                             |
|-------|---|-----|-----|--------|------------------------------|-----|----|-----|-------------------------|-------------------------|------------------|----------------|-------------------|----------|---------------------------------------------------------------------------------------------------------------------------------------------------------------------------------------------------------------------------------------------------------------------------------------------|
| 62848 | F | Dup | 12  | q24.23 | hg18, 12:117061815-117183853 | 122 | NA | 71  | TAOK3, PEBP1            | TAOK3 e9, e10, e18, e21 | Confirmed        | <i>de novo</i> | Likely benign     | 6.0      | Pathogenic heterozygous mutation in SHANK2: c.2514_2515insG (p.P841Sfs*32) was found in this patient by whole-exome sequencing.                                                                                                                                                             |
| 64926 | M | Dup | 1   | p35.1  | hg18, 1:33599961-33727852    | 128 | 90 | 100 | ZSCAN20, PHC2           | ZSCAN20 e2, e3          | Confirmed        | Maternal       | no evidene        | 2.7      |                                                                                                                                                                                                                                                                                             |
| 62709 | M | Del | 17  | q25.3  | hg18, 17:73412776-73547163   | 134 | 90 | 90  | TNRC6C                  | TNRC6C e2               | Confirmed        | Paternal       | no evidene        | 2.7      |                                                                                                                                                                                                                                                                                             |
| 63930 | M | Del | 5   | q15    | hg18, 5:95753227-95900228    | 147 | 92 | 162 | PCSK1                   | PCSK1 e3, e11           | Confirmed        | Paternal       | no evidene        | 2.7      | This patient has balanced translocation 5/12.                                                                                                                                                                                                                                               |
| 71156 | F | Del | 16  | p13.3  | hg19, 16:3788867-3935836     | 147 | 91 | 353 | <b>CREBBP</b>           | MLPA Kit P245           | Confirmed        | <i>de novo</i> | <b>Pathogenic</b> | Cytoscan | This deletion was within CREBBP which is the OMIM gene for Rubinstein-Taybi syndrome.                                                                                                                                                                                                       |
| 56761 | M | Del | X&Y | q28    | hg18, X:154686877-154843251  | 156 | NA | 15  | VAMP7                   | VAMP7 e4, e5            | Confirmed        | Paternal       | Likely benign     | 6.0      | Sanger sequencing of the gene was negative. Patient 272246 in Decipher database with similar inherited deletion, has an additional 10Mb de novo deletion.                                                                                                                                   |
| 68422 | M | Dup | 1   | q43    | hg19, 1:236964009-237124627  | 161 | 90 | 236 | MTR                     | N/A                     | array in parents | Maternal       | no evidene        | Cytoscan |                                                                                                                                                                                                                                                                                             |
| 55113 | M | Del | 3   | p14.1  | hg18, 3:67592633-67762247    | 170 | 93 | 198 | SUCLG2                  | SUCLG2 e5, e9           | Confirmed        | Maternal       | VOUS              | 2.7      | Sanger sequencing of the gene was negative. Patient 265229 in Decipher database with deletion within SUCLG2 (inherited) and patient 259685 with duplication of the whole gene (inherited) have different phenotypes. SUCLG2 encodes a GTP-specific beta subunit of succinyl-CoA synthetase. |
| 62155 | M | Del | 9   | p22.1  | hg18, 9:19379757-19555588    | 176 | NA | 113 | ASAH3L (ACER2), SLC24A2 | ASAH3L (ACER2) e2, e4   | Confirmed        | Maternal       | Likely benign     | 6.0      | Sanger sequencing of the gene was negative. Pathogenic hemizygous 4 bp del in RPS6KA3 (RSK2): IVS10+4_+7delAGTA was found in this patient confirming the clinical diagnosis of Coffin-Lowry syndrome.                                                                                       |
| 60245 | F | Del | 16  | q23.3  | hg18, 16:81560769-81736858   | 176 | 93 | 259 | CDH13                   | CDH13 e3, e4            | Confirmed        | Maternal       | Likely benign     | 2.7      | Pathogenic heterozygous mutation in PTPN11: c.922A>G (p.N308D) was found in this patient confirming the diagnosis of Noonan syndrome. There are two duplications and five deletions within CDH13 (inherited or undefined) in Decipher database.                                             |

|       |   |     |    |        |                             |     |    |     |                                                       |                                 |           |             |                                |          |                                                                                                                                                                                                                                                                                 |
|-------|---|-----|----|--------|-----------------------------|-----|----|-----|-------------------------------------------------------|---------------------------------|-----------|-------------|--------------------------------|----------|---------------------------------------------------------------------------------------------------------------------------------------------------------------------------------------------------------------------------------------------------------------------------------|
| 68942 | M | Dup | X  | q25    | hg19, X:122803456-122986898 | 183 | 94 | 516 | THOC2                                                 | THOC2 e1, e3                    | Confirmed | Maternal    | no evidence                    | Cytoscan | This duplication was also present in maternal grandfather.                                                                                                                                                                                                                      |
| 60482 | M | Dup | 1  | p33    | hg18, 1:46605120-46799318   | 194 | NA | 110 | DMBX1, KCNC, FAAH, MKNK1                              | FAAH e3, e11; DMXB1 i1-2, e3    | Confirmed | Paternal    | no evidence                    | 6.0      |                                                                                                                                                                                                                                                                                 |
| 57650 | M | Del | X  | p21.1  | hg18, X:31598556-31801270   | 203 | 99 | 257 | DMD                                                   | MLPA Kit P034                   | Confirmed | Parents N/A | Pathogenic, incidental finding | 2.7      | This deletion within DMD gene, in a male patient with facial dysmorphism, developmental delay and ptosis but no sign of muscular dystrophy and normal muscle enzymes, was considered as an incidental finding with prognostic value. The deletion does not affect Dp71 isoform. |
| 63153 | F | Dup | 1  | p34.3  | hg18, 1:38974598-39179543   | 205 | 90 | 168 | GJA9, RRAGC, MYCBP, RHBDL2                            | GJA9 e2; RRAGC e7               | Confirmed | Paternal    | Likely benign                  | 2.7      | There are three partially overlapping deletions and one duplication in DGV database.                                                                                                                                                                                            |
| 61006 | M | Dup | 4  | q25    | hg18, 4:113767097-113982110 | 215 | 89 | 133 | LARP7, C4orf21, ANK2                                  | LARP7 e2; C4orf21 e1; ANK2 e1   | Confirmed | Maternal    | no evidence                    | 2.7      |                                                                                                                                                                                                                                                                                 |
| 62789 | F | Dup | 20 | p13    | hg18, 20:2635422-2864768    | 229 | NA | 136 | FAM113A, CPXM1, VPS16, PCED1A, C20orf141, EBF4, PTPRA | VPS16 e22                       | Confirmed | Father N/A  | VOUS                           | 6.0      | This dup was absent in the mother but present in the likewise affected sister. Father's DNA was not available. There are patients 254264 and 272274 in Decipher database with similar inherited duplications and ID.                                                            |
| 60045 | M | Dup | 6  | p21.1  | hg18, 6:42147766-42383555   | 236 | 90 | 212 | GUCA1B, GUCA1A, MRPS10, TRERF1, TAF8                  | GUCA1A e5, e6                   | Confirmed | Maternal    | no evidence                    | 2.7      |                                                                                                                                                                                                                                                                                 |
| 60984 | F | Dup | X  | q22.3  | hg18, X:110044420-110289813 | 245 | 91 | 301 | PAK3                                                  | PAK3 e1, e2                     | Confirmed | Paternal    | Likely benign                  | 2.7      | PAK3 is a known X-linked recessive disease gene. In our case, it is a duplication and it is inherited from the healthy father.                                                                                                                                                  |
| 59700 | M | Dup | 19 | p13.11 | hg18, 19:17283794-17537339  | 254 | NA | 81  | 11 genes                                              | FAM125A (MVB12A) e2; SLC27A1 e2 | Confirmed | Maternal    | Likely benign                  | 6.0      | An overlapping duplication is present in 1/1038 of a world wide control cohort by Affymetrix.                                                                                                                                                                                   |
| 53983 | M | Del | 7  | q31.33 | hg18, 7:125890040-126149790 | 260 | 93 | 301 | GRM8                                                  | GRM8 e7, e8                     | Confirmed | Paternal    | Likely pathogenic              | 2.7      | Sanger sequencing of the gene was negative. Several CNVs of GRM8 have been reported in patients with ADHD compared to controls.                                                                                                                                                 |
| 57614 | M | Del | 3  | q12.3  | hg18, 3:103671524-103941739 | 270 | NA | 141 | ZPLD1                                                 | ZPLD1 e10, e11                  | Confirmed | Maternal    | no evidence                    | 6.0      |                                                                                                                                                                                                                                                                                 |

|       |   |     |    |             |                             |     |    |      |                    |                               |                   |             |                                           |          |                                                                                                                                                                                                                                                                                                                                                                                                                                                             |
|-------|---|-----|----|-------------|-----------------------------|-----|----|------|--------------------|-------------------------------|-------------------|-------------|-------------------------------------------|----------|-------------------------------------------------------------------------------------------------------------------------------------------------------------------------------------------------------------------------------------------------------------------------------------------------------------------------------------------------------------------------------------------------------------------------------------------------------------|
| 57028 | F | Del | 4  | q22.3       | hg18, 4:98745657-99078956   | 333 | 93 | 304  | C4orf37 (STPG2)    | C4orf37 (STPG2) e10           | Confirmed         | Paternal    | VOUS                                      | 2.7      | Sanger sequencing of the gene was negative. There are patients 249670 (maternally inherited) with partially overlapping phenotype to our patient and 256952 (inherited from normal parent) with seizure in Decipher database who have intragenic STPG2 deletions.                                                                                                                                                                                           |
| 59248 | F | Del | 1  | q24.3       | hg18, 1:170135864-170505998 | 372 | NA | 244  | DNM3               | N/A                           | confirmed by FISH | de novo     | VOUS                                      | 6.0      | Sanger sequencing of the gene was negative. DNM3 encodes dynamin 3, a member of a family of guanosine triphosphate (GTP)-binding proteins that associate with microtubules and are involved in vesicular transport. WES of the patient and healthy parents revealed a heterozygous de novo missense mutation in ADAM7: c.190A>G (p.K64E). Since no germline mutation of ADAM7 has been reported so far, the relevance of this finding remains also unclear. |
| 63409 | F | Del | X  | q13.1       | hg18, X:70006030-70385683   | 380 | 93 | 209  | 10 genes           | IL2RG i4-5, e6; MED12 e9, e13 | Confirmed         | Maternal    | Pathogenic (in males), incidental finding | 2.7      | This patient was later diagnosed with Opitz-Bohring syndrome with pathogenic mutation in ASXL1:c.2197C>T (p.Gln733X). The deletion contains several known X-linked recessive disease genes and is likely lethal in males. The patient, carrier mother and grandmother showed 98% skewing of X-inactivation.                                                                                                                                                 |
| 64717 | F | Dup | 16 | p11.22      | hg18, 16:29594946-30038054  | 443 | 88 | 287  | 25 genes           | MLPA Kit P297                 | Confirmed         | Maternal    | Likely pathogenic                         | 2.7      | Recurrent 16p11.22 microduplications syndrome.                                                                                                                                                                                                                                                                                                                                                                                                              |
| 71264 | M | Del | 17 | q21.31      | hg19, 17:43703800-44163085  | 459 | 90 | 857  | 9 genes            | MLPA Kit P245                 | Confirmed         | de novo     | Pathogenic                                | Cytoscan | Recurrent 17q21.31 microdeletion syndrome.                                                                                                                                                                                                                                                                                                                                                                                                                  |
| 48459 | M | Del | 14 | q24.3-q31.1 | hg18, 14:78321869-78784675  | 462 | 92 | 586  | NRXN3              | NRXN3 e9, e10                 | Confirmed         | Paternal    | Likely pathogenic                         | 2.7      | Sanger sequencing of the gene was negative. A mixture of inherited and de novo deletions within NRXN3 has been reported in ASD.                                                                                                                                                                                                                                                                                                                             |
| 69234 | F | Del | X  | p11.4       | hg19, X:41339667-41811516   | 472 | 91 | 1040 | CASK, GPR34, GPR82 | CASK e23, e24                 | Confirmed         | de novo     | Pathogenic                                | Cytoscan | Phenotypic spectrum associated with CASK loss-of-function has been described.                                                                                                                                                                                                                                                                                                                                                                               |
| 52253 | M | Del | 17 | q21.31      | hg18, 17:41049320-41522088  | 473 | NA | 329  | 9 genes            | MLPA Kit P245                 | Confirmed         | Parents N/A | Pathogenic                                | 6        | Recurrent 17q21.31 microdeletion syndrome.                                                                                                                                                                                                                                                                                                                                                                                                                  |

|       |   |     |    |       |                             |     |    |     |                                       |                                 |               |          |               |          |                                                                                                                     |
|-------|---|-----|----|-------|-----------------------------|-----|----|-----|---------------------------------------|---------------------------------|---------------|----------|---------------|----------|---------------------------------------------------------------------------------------------------------------------|
| 57305 | M | Dup | 21 | q21.1 | hg18, 21:21541563-22029191  | 488 | NA | 331 | NCAM2                                 | NCAM2 e10, e12                  | Confirmed     | Paternal | Likely benign | 6.0      | There is an almost overlapping deletion in Decipher population CNVs (singleton).                                    |
| 62848 | F | Del | 3  | q22.1 | hg18, 3:132148497-132640489 | 492 | NA | 263 | NEK11, ASTE1, NUDT16, NUDT16P, ATP2C1 | ATP2C1 e23; NEK11 e16           | Confirmed     | Paternal | no evidence   | 6.0      |                                                                                                                     |
| 69551 | M | Dup | X  | q25   | hg19, X:123586540-123589505 | 3   | 88 | 16  | ODZ1 (TENM1)                          | ODZ1 (TENM1) e23                | Not Confirmed |          |               | Cytoscan |                                                                                                                     |
| 66314 | F | Dup | 22 | q13.2 | hg 19, 22:41530715-41533822 | 3   | 94 | 16  | EP300                                 | MLPA Kit P333                   | Not Confirmed |          |               | Cytoscan |                                                                                                                     |
| 57123 | F | Del | 5  | q12.3 | hg18, 5:64893125-64897683   | 5   | 93 | 8   | CENPK, PPWD1                          | CENPK i1-2; PPWD1 e1            | Not Confirmed |          |               | 2.7      | It was only detected by annotation 29.                                                                              |
| 69551 | M | Dup | X  | p11.4 | hg19, X:41392871-41396522   | 4   | 91 | 11  | CASK                                  | CASK e23, e24                   | Not Confirmed |          |               | Cytoscan |                                                                                                                     |
| 56894 | F | Del | 1  | q42.2 | hg19, 1:231999534-232003661 | 4   | 92 | 12  | DISC1                                 | DISC1 i9-10, e10                | Not Confirmed |          |               | Cytoscan |                                                                                                                     |
| 67354 | F | Del | 9  | p24.3 | hg19, 9:332170-336058       | 4   | 92 | 12  | DOCK8                                 | DOCK8 e11, i11-12               | Not Confirmed |          |               | Cytoscan |                                                                                                                     |
| 67674 | M | Del | 11 | p14.2 | hg19, 11:26535654-26539603  | 4   | 92 | 12  | ANO3                                  | ANO3 i5-6, i6-7                 | Not Confirmed |          |               | Cytoscan |                                                                                                                     |
| 65010 | M | Del | 5  | q12.1 | hg18, 5:61926273-61935437   | 9   | 93 | 12  | IPO11                                 | IPO11 i27-28, e28               | Not Confirmed |          |               | 2.7      | It was only detected by annotation 29.                                                                              |
| 63935 | M | Del | X  | q28   | hg18, X:147733407-147741983 | 9   | 95 | 10  | AFF2                                  | AFF2 e6, e7, i7-8               | Not Confirmed |          |               | 2.7      |                                                                                                                     |
| 60984 | F | Del | 4  | p14   | hg18, 4:39021615-39032347   | 11  | 89 | 12  | RFC1                                  | RFC1 e2, e3                     | Not Confirmed |          |               | 2.7      | It was only detected by annotation 29.                                                                              |
| 66075 | F | Del | 11 | q14.1 | hg18, 11:77960543-77971422  | 11  | 88 | 14  | NARS2                                 | NARS2 e1, e2                    | Not Confirmed |          |               | 2.7      |                                                                                                                     |
| 64622 | M | Del | 11 | q21   | hg18, 11:93862415-93873098  | 11  | 88 | 15  | MRE11A, ANKRD49                       | MRE11A e1, ANKRD49 i2-3         | Not Confirmed |          |               | 2.7      |                                                                                                                     |
| 38048 | M | Del | 10 | q22.1 | hg18, 10:71953731-71965051  | 11  | 90 | 12  | KIAA1274 (PALD1)                      | KIAA1274 (PALD1) e2, e3, e5, e6 | Not Confirmed |          |               | 2.7      | This patient was later diagnosed with acrocallosal syndrome with pathogenic compound heterozygous mutation in KIF7. |
| 38004 | F | Del | 1  | p31.3 | hg18, 1:66862092-66873951   | 12  | 90 | 15  | SGIP1                                 | SGIP1 e2, e3, e4                | Not Confirmed |          |               | 2.7      |                                                                                                                     |



|                       |               |     |    |        |                             |     |    |    |                    |                              |               |          |                                        |
|-----------------------|---------------|-----|----|--------|-----------------------------|-----|----|----|--------------------|------------------------------|---------------|----------|----------------------------------------|
| 67116                 | F             | Del | 5  | q33.1  | hg18, 5:151746458-151759934 | 13  | 86 | 12 | NMUR2              | NMUR2 e2, e3                 | Not Confirmed | 2.7      |                                        |
| 66075                 | F             | Del | 4  | q25    | hg18, 4:113765627-113779348 | 14  | 88 | 17 | LARP7, C4orf21     | LARP7 e1; C4orf21 e1         | Not Confirmed | 2.7      | It was only detected by annotation 29. |
| 64103                 | M             | Del | 14 | q21.31 | hg18, 14:41498859-41512482  | 14  | 87 | 19 | KIAA1267 (KANSL1)  | KIAA1267 (KANSL1) e4, e5     | Not Confirmed | 2.7      |                                        |
| 68198                 | M             | Del | 1  | p35.1  | hg18, 1:32918077-32933954   | 16  | 89 | 17 | SYNC, RBBP4        | SYNC e1, e2, e3              | Not Confirmed | 2.7      |                                        |
| 62783                 | M             | Del | 2  | q36.1  | hg18, 2:223459673-223479127 | 19  | 88 | 19 | ACSL3              | ACSL3 i2-3, e3               | Not Confirmed | 2.7      |                                        |
| 65880                 | M             | Dup | X  | q25    | hg19, X:123541092-123559735 | 19  | 85 | 44 | ODZ1 (TENM1)       | ODZ1 (TENM1) e23, e24        | Not Confirmed | Cytoscan |                                        |
| 60439                 | M             | Del | 15 | q26.3  | hg18, 15:97948427-97967301  | 19  | 88 | 21 | MEF2A              | MEF2A i1-2, i2-3             | Not Confirmed | 2.7      |                                        |
| 67687                 | F             | Del | 9  | q21.11 | hg18, 9:72418692-72446917   | 28  | 88 | 30 | TRPM3              | TRPM3 e11, e12               | Not Confirmed | 2.7      |                                        |
| 61186                 | M             | Del | 1  | p36.21 | hg18, 1:15829278-15860394   | 31  | 86 | 33 | DDI2, RSC1A1       | DDI2 e6, e9                  | Not Confirmed | 2.7      |                                        |
| 62075                 | F             | Del | 7  | p12.2  | hg18, 7:49959248-49994235   | 35  | 87 | 42 | ZPBP               | ZPBP e7, i7-8                | Not Confirmed | 2.7      |                                        |
| 56985                 | M             | Dup | 6  | q16.3  | hg18, 6:102585885-102621667 | 36  | 89 | 48 | GRIK2              | GRIK2 e14, e15               | Not Confirmed | 2.7      | It was only detected by annotation 29. |
| 58404                 | F             | Del | 1  | p34.3  | hg18, 1:36197451-36234202   | 37  | 86 | 40 | EIF2C3 (AGO3)      | EIF2C3 (AGO3) i3-4, e5, i5-6 | Not Confirmed | 2.7      |                                        |
| 66075                 | F             | Del | 3  | q29    | hg18, 3:197974381-198016767 | 42  | 85 | 51 | PAK2               | PAK2 e2, e3                  | Not Confirmed | 2.7      |                                        |
| 60407 & 66928 & 60324 | F (all three) | Del | 18 | q21.1  | hg18, 18:43620216-43668188  | 48  | 88 | 31 | SMAD2              | SMAD2 e3, e6                 | Not Confirmed | 2.7      | They are triplet.                      |
| 62924                 | M             | Dup | 11 | q13.5  | hg18, 11:76468150-76561055  | 93  | 88 | 63 | OMP, MYO7A, CAPN5  | MYO7A e14, e15; CAPN5 e5, e9 | Not Confirmed | 2.7      |                                        |
| 48307                 | M             | Dup | 4  | p16.1  | hg18, 4:8994976-9095173     | 100 | NA | 52 | DEFB131, LOC650293 | DEFB131 e1                   | Not Confirmed | 6.0      |                                        |

|       |   |     |    |        |                             |     |    |     |                                 |                                |               |     |
|-------|---|-----|----|--------|-----------------------------|-----|----|-----|---------------------------------|--------------------------------|---------------|-----|
| 48307 | M | Del | 5  | p15.33 | hg18, 5:723744-826556       | 102 | NA | 34  | TPPP                            | TPPP e2                        | Not Confirmed | 6.0 |
| 60106 | M | Dup | 4  | q13.3  | hg18, 4:72549816-72662940   | 113 | 90 | 142 | SLC4A4                          | SLC4A4 e19, e25                | Not Confirmed | 2.7 |
| 61186 | M | Dup | 18 | q22.3  | hg18, 18:70252255-70369954  | 118 | 88 | 73  | C18orf51 (FAM69C), CNDP2, CNDP1 | C18orf51 (FAM69C) e3, CNDP2 e6 | Not Confirmed | 2.7 |
| 62783 | M | Dup | 8  | q24.3  | hg18, 8:141587386-141711847 | 124 | 88 | 112 | EIF2C2 (AGO2), CHRAC1           | EIF2C2 (AGO2) e2, e3           | Not Confirmed | 2.7 |
| 64170 | F | Dup | X  | p11.22 | hg18, X:50147702-50277014   | 129 | 88 | 131 | DGKK                            | DGKK e1, e4                    | Not Confirmed | 2.7 |
| 66075 | F | Dup | X  | p22.11 | hg18, X:23210130-23347055   | 137 | 88 | 132 | PTCHD1                          | PTCHD1 e2, e3                  | Not Confirmed | 2.7 |
| 62075 | F | Dup | X  | q22.1  | hg18, X:101379750-101531945 | 152 | 88 | 131 | NXF2, NXF2B                     | NXF2 e3, e23                   | Not Confirmed | 2.7 |
| 61098 | M | Dup | 19 | p13.3  | hg18, 19:2096867-2277988    | 181 | NA | 44  | 10 genes                        | DOT1L e5, e6                   | Not Confirmed | 6.0 |

## **Pathogenic or likely pathogenic inherited heterozygous CNVs**

patient 58822, 8 kb deletion within *AUTS2*, paternally inherited (pathogenic)

*AUTS2* (autism susceptibility candidate 2, MIM \*607270) was first discovered as a candidate gene when it was found to be disrupted by a balanced translocation in a pair of monozygotic twins with autism, developmental delay and epilepsy.<sup>1</sup> Despite some functional studies indicating its nuclear location, brain expression in various cell types as well as in regions implicated in autism spectrum disorder (ASD) and its potential role in neuronal development,<sup>2-3</sup> exact function of the gene and its pathways are unknown.

We found an 8 kb in-frame deletion encompassing exon 4 of *AUTS2* in a male patient with mild developmental delay, growth deficiency, microcephaly, cryptorchidism, bilateral inguinal and umbilical hernia, and minor anomalies including clinodactyly of the 5th finger, mild interdigital webbing and joint laxity. At the age 5 years 10 months height was 103 cm (<3rd centile), weight 16 kg (3rd centile), OFC 49 cm (<3rd centile) and eruption of teeth was delayed with first tooth at the age of 1 year. He was speaking in full sentences but was shy and had some mild motor delay with balancing problems and reduced pain sensitivity. This deletion was paternally inherited and the father was likewise affected with relative short stature (168.2 cm (10th-25th centile), OFC 55cm (10th centile)) in comparison to his parents, brother and sisters who had a height of about 180 cm.

Various aberrations disrupting *AUTS2* have been linked to ID, developmental delay and ASD. In addition, many of the reported patients have had additional manifestations such as epilepsy, microcephaly, facial dysmorphisms and short stature.<sup>4-6</sup> A recent study reported 24 exonic microdeletions of the gene in patients with variable neuro-developmental features, growth and feeding problems, skeletal abnormalities, and congenital malformations introducing an *AUTS2* syndrome. They indicated that dysmorphic features and ID were more pronounced in individuals with 3' deletions because these affect also the alternative transcript of exons 9-19, which is expressed in brain.<sup>4</sup> The finding of the mild phenotype in our family with exon 4 deletion, which is 5' of the alternative transcription start, further supports this genotype-phenotype correlation and emphasises mild short stature as a major clinical finding.

Possible regulatory function of *AUTS2* is in line with the presence of several protein interaction motifs for SH2, SH3, and WW domains, as well as the existence of numerous phosphorylation sites.<sup>3</sup> Since no functional domains were reported for exon 4, protein interaction motifs and phosphorylation sites were predicted using the eukaryotic linear motif (ELM) databank.<sup>7</sup> Phosphorylation sites were additionally verified using the NetPhosK

server.<sup>8</sup> The absence of exon 4 resulting in the deletion of amino acids 209-220 affects a sequence stretch that contains an unusually high number of residues that are predicted to become phosphorylated: S207, S209, S210, S213, S214, T217, and Y219. Interestingly, the spacing of the serine residues meets exactly the preferences for the action of the hierarchical protein kinases CK1 and GSK3.<sup>9</sup> Residues T217 and Y219 are part of the typical TGY dual-phosphorylation motif of MAP-kinase p38, which becomes phosphorylated by kinases of the MKK family during cell cycle regulation.<sup>10</sup>

patient 64717, 443 kb duplication in 16p11.2, maternally inherited (likely pathogenic)

Recurrent reciprocal 16p11.2 CNVs are characterised by a spectrum of neuro-cognitive and psychiatric phenotypes that are subject to incomplete penetrance and variable expressivity.<sup>11-12</sup>

CMA revealed a 443 kb maternally inherited duplication on 16p11.2 (MIM #614671) encompassing 25 genes in the girl referred for global developmental delay, muscular hypotonia, mild unsteady gate, and overgrowth. She was born spontaneously at term with weight 4500 g (>97th centile) and length 50 cm (25th centile). Developmental milestones were delayed (walking age 2 years, first words at ~4 years). At the age of 6 years and 8 months, her weight, height and head circumference were 31.9 kg (>97th centile), 131 cm (>97th centile; father: 180 cm, mother: 170 cm) and 50 cm (10th-25th centile). Physical examination revealed brachycephaly, relatively short neck, round face with prominent cheeks, narrow eyebrows, hypertelorism, broad philtrum, high-arched palate and large ears (6 cm; 98th centile). Since recurrent 16p11.2 CNVs have been associated with developmental delay, ID, autism, ADHD, seizures, and psychiatric problems and the spectrum of abnormal phenotypes has been expanded to include congenital abnormalities,<sup>12</sup> it is very likely that the duplication is pathogenic in this patient with incomplete penetrance or variable expressivity since the mother's cognition was not formally tested.

patient 48459, 462 kb deletion within *NRXN3*, paternally inherited (likely pathogenic)

*NRXN3* (MIM \*600567) encodes neurexin 3 in alpha- and beta isoforms expressed at variable levels throughout the brain. The neurexins are highly expressed in presynaptic terminals and have been shown to have important roles in synaptic cell adhesion and neurotransmitter secretion.<sup>13</sup>

CMA revealed a 462 kb paternally inherited deletion encompassing exons 6-12 of the alpha isoform of *NRXN3* and reaching very closely to the transcription start of the beta isoform

(Figure S2). Sanger sequencing of the gene in the patient revealed no pathogenic mutation. This boy was referred due to mild learning difficulties, minor motor problems, dilated cardiomyopathy, some facial features and anal atresia. Deletions of *NRXN3* have been recently reported in patients with ASD (one de novo, one inherited from the father with borderline autism phenotype, and two inherited from apparently healthy parents) with reduced penetrance and variable expressivity.<sup>14</sup> Therefore, the *NRXN3* deletion likely contributes to the learning difficulty in our patient, but the cause of his physical problems remains unknown.

patient 53983, 260 kb deletion within *GRM8*, paternally inherited (likely pathogenic)

*GRM8* (MIM \*601116) encoding glutamate receptor, metabotropic 8 is a group III metabotropic glutamate receptor which is linked to the inhibition of the cyclic AMP cascade with high expression in human fetal and adult brains.<sup>15</sup>

CMA showed a 260 kb paternally inherited deletion within the gene *GRM8*. This deletion encompasses exons 8 and 9 of the major isoforms a and b which causes a frame-shift introducing a premature stop codon at aa 516 and resulting in the removal of all transmembrane domains.<sup>15</sup> Concerning the minor, probably secreted isoform c without transmembrane domains,<sup>15</sup> the deletion affects exons 7-9 and causes an addition of 64 aminoacids and stop at amino acid 516. Sequencing of the gene in the patient for a second hit revealed no mutation.

The boy was born spontaneously at 40 weeks of gestation without complications. Birth weight was 3680 g (50th-75th centile), length 52 cm (25th-50th centile) and head circumference was 34.5 cm (10th-25th centile). Apgar scores were 8/9/10. At the age of 1 year, he was diagnosed with a mixed spastic-ataxic movement disorder and a convergent strabismus with reduced vision on the left eye. He was hypotonic and his development was globally retarded with speech delay and unaided walking at age 3 years. Due to his long face with prominent forehead and periorbital fullness Fragile X syndrome was suspected but molecular testing revealed a normal repeat length. At age 6 10/12 years he showed hypotonia and fine and gross motor clumsiness, but there was no evidence for a movement disorder. He was distractible and hyperactive but was speaking fluently with some deficits and formal Kaufman ABC testing revealed a low normal IQ of about 80 with special strength in the puzzle subtest (level 96). His weight, height, and head circumference were 20.5 kg (19th centile), 121 cm (40th centile) and 49.5 cm (2nd centile), respectively. He received physical, occupational and speech therapy and attended a special school. Physical examination revealed mild left sided strabismus, anteverted nostrils, flat philtrum, large mouth, wide tooth spacing, high-arched

palate, retrognathia, clinodactyly of toes 4 and 5 and joint laxity. The older sister who does not carry the deletion also had a mild cerebral movement disorder, low normal head circumference (3rd-10th centile) and low normal cognition with an average HWAIK IV testing result of 88. Their non-carrier mother has had learning disability and developed epilepsy and hearing loss in adulthood. The carrier father attended regular school and completed an apprenticeship in a drug store, but functioned on a low social level.

CNVs of glutamate receptor genes have been associated with ADHD including eight patients out of 2493 with deletions in *GRM8* but none in controls.<sup>16</sup> One patient with a paternally inherited 34.7 kb exonic duplication within *GRM8* and two maternally inherited intronic CNVs have been reported among rare CNVs in individuals with ASD.<sup>17</sup> Thus in accordance with the literature findings attention deficit and hyperactivity of the patient could be well explained by *GRM8* defect, but additional unidentified familial factors may contribute to his phenotype.

**Figure S1. Expression analysis of *ACOT7* (isoform ENST00000377855) in cDNA panels from fetal and adult human tissues.**

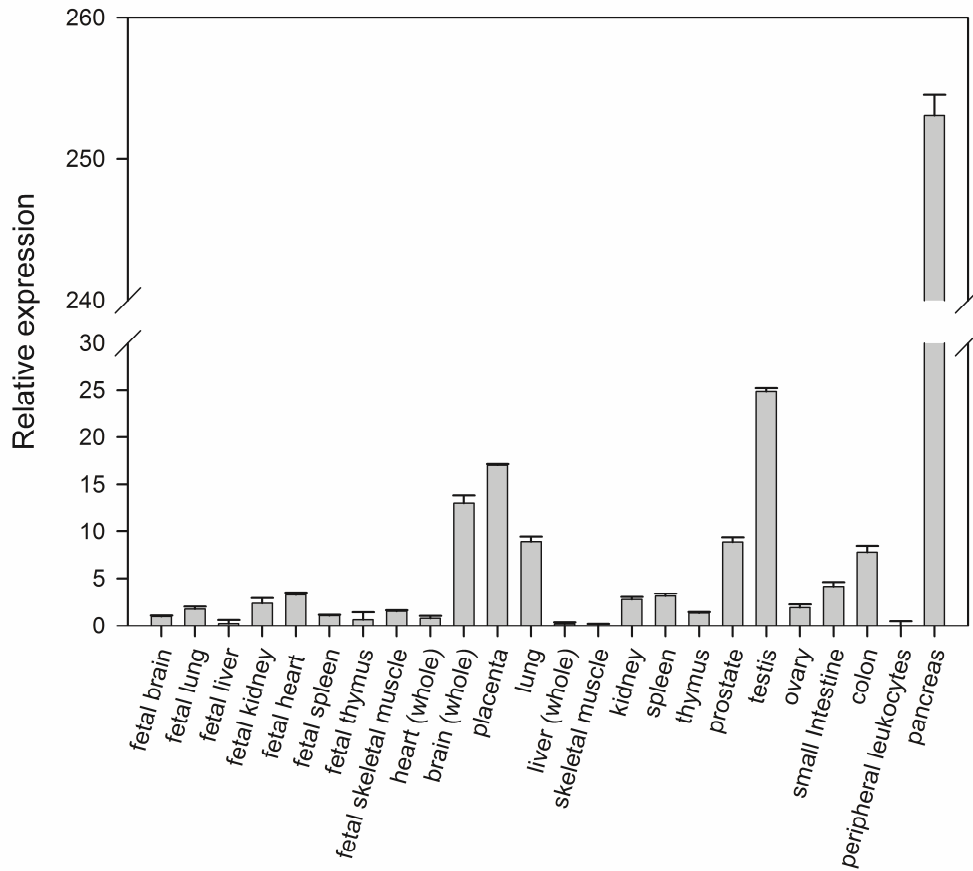

Expression analysis was performed using customized SYBR green qPCR for exons 1 & 2 of *ACOT7* (specific for isoform ENST00000377855). Relative expression levels normalized to GAPDH were set into relation to the mean expression value of this isoform in fetal brain. The highest levels were found in adult pancreas, testis, brain, lung, prostate and colon. No expression was detected in peripheral leukocytes.

**Figure S2. Screenshot of the array finding in patient 48459 compared to ASD cases reported by Vaags et al.<sup>14</sup> and controls.**

Patient 48459 in this study, 462kb deletion, paternal

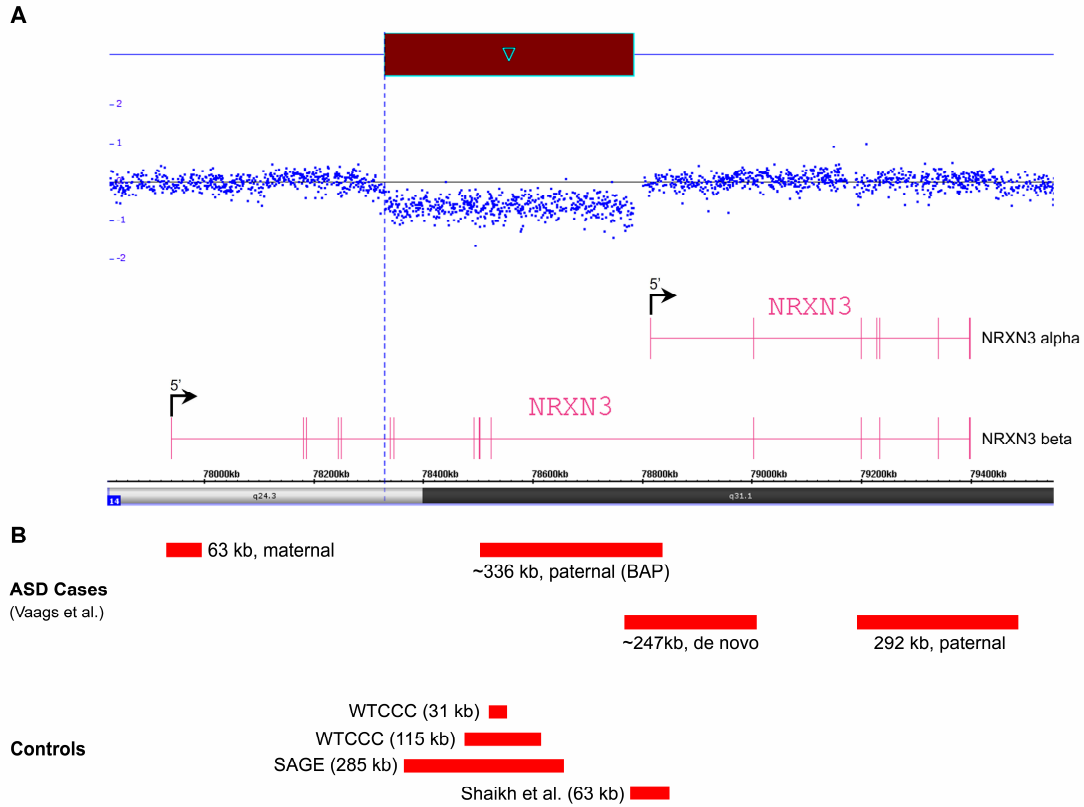

(A) Affymetrix 2.7 array derived plots of copy number and log<sub>2</sub> ratio values of the *NRXN3* region in patient 48459 indicating a 462 kb deletion encompassing exons 6-12 of the alpha isoform and reaching very closely to the transcription start of the beta isoform. (B) ASD cases with inherited or de novo deletions of *NRXN3* reported by Vaags et al.<sup>14</sup> and controls from the Wellcome Trust Case Control Consortium (WTCCC), the Study of Addiction: Genetics and Environment (SAGE) consortium and Shaikh et al.<sup>18</sup> Father of the affected child with the 336 kb paternal deletion has had clinical diagnosis of broader autism phenotype (BAP).



**Supplementary Table 2. Clinical and genetic features of patients with inherited heterozygous or homozygous candidate CNVs ≤ 500 kb sorted by descending size**

| Patient ID | Age* (yrs) | Gender | Phenotype                                                                                                                                                      | Aberration  | Chromosome band | Genome coordinates              | Size (kb) | Confidence value (%) | Marker count | Affected gene(s)                                                  | Validation                                                         | Sanger sequencing of the affected genes | Pathogenicity                                                                                                                                                                                         |
|------------|------------|--------|----------------------------------------------------------------------------------------------------------------------------------------------------------------|-------------|-----------------|---------------------------------|-----------|----------------------|--------------|-------------------------------------------------------------------|--------------------------------------------------------------------|-----------------------------------------|-------------------------------------------------------------------------------------------------------------------------------------------------------------------------------------------------------|
| 57305      | 4          | M      | muscular hypotonia, microcephaly, chorioretinal dysplasia, and lymphedema                                                                                      | duplication | 21q21.1         | hg18, chr21: 21541563-22029191  | 488       | N/A                  | 331          | <i>NCAM2</i>                                                      | MLPA/ paternally inherited                                         | N/A                                     | likely benign (there is an almost overlapping deletion in Decipher population CNVs singleton)                                                                                                         |
| 48459      | 7          | M      | mild learning difficulties, motor problems, facial dysmorphic features, dilated cardiomyopathy, and anal atresia                                               | deletion    | 14q24.3-q31.1   | hg18, chr14: 78321869-78784675) | 462       | 92                   | 586          | <i>NRXN3</i>                                                      | MLPA/ paternally inherited                                         | negative                                | likely pathogenic, reduced penetrance (a mixture of inherited and de novo deletions within <i>NRXN3</i> has been reported in ASD) <sup>14</sup>                                                       |
| 64717      | 6          | F      | developmental delay, and overgrowth                                                                                                                            | duplication | 16p11.2         | hg18, chr16: 29594946-30038054  | 443       | 88                   | 287          | 25 genes on 16p11.2                                               | MLPA/ maternally inherited                                         | N/A                                     | likely pathogenic, reduced penetrance (recurrent microduplication syndrome) <sup>19</sup>                                                                                                             |
| 57028      | 1          | F      | developmental delay, severe speech delay, microcephaly, facial dysmorphic features, hallux valgus, and short stature                                           | deletion    | 4q22.3          | hg18, chr4: 98745657-99078956   | 333       | 93                   | 304          | <i>C4orf37 (STPG2)</i>                                            | MLPA/ paternally inherited                                         | negative                                | VOUS (there are patients 249670 (maternally inherited) similar to our patient and 256952 (inherited from normal parent) with seizure in Decipher database who have intragenic <i>STPG2</i> deletions) |
| 53983      | 1          | M      | developmental delay, hypotonia, and strabismus                                                                                                                 | deletion    | 7q31.33         | hg18, chr7: 125890040-126149790 | 260       | 93                   | 301          | <i>GRM8</i>                                                       | MLPA/ paternally inherited                                         | negative                                | likely pathogenic, reduced penetrance (several CNVs of <i>GRM8</i> have been reported in ADHD compared to controls) <sup>16</sup>                                                                     |
| 59700      | 7          | M      | global developmental delay, congenital cerebellar ataxia, and sensorineural hearing loss                                                                       | duplication | 19p13.11        | hg18, chr19: 17283794-17537339  | 254       | N/A                  | 81           | 11 genes                                                          | MLPA/ maternally inherited                                         | N/A                                     | likely benign (an overlapping duplication is present in 1/1038 of a world wide control cohort by Affymetrix)                                                                                          |
| 60984      | 4          | F      | developmental delay, growth hormone deficiency, celiac disease, hypoplastic left kidney                                                                        | duplication | Xq22.3          | hg18, chrX: 110044420-110289813 | 245       | 91                   | 301          | <i>PAK3</i>                                                       | MLPA/ paternally inherited                                         | N/A                                     | likely benign ( <i>PAK3</i> is a known X-linked recessive disease gene. In our case, it is a duplication and it is inherited from the healthy father)                                                 |
| 62789      | 14         | F      | developmental delay, truncal ataxia, generalized epilepsy, and tall stature                                                                                    | duplication | 20p13           | hg18, chr20: 2635422-2864768    | 229       | N/A                  | 136          | <i>VPS16, FAM113A (PCED1A), C20orf141, CPXM1, EBF4, and PTPRA</i> | MLPA/ (absent in the mother, but father was N/A, (likely paternal) | N/A                                     | VOUS (this duplication was absent in the mother but present in the likewise affected sister. There are patients 254264 and 272274 in Decipher database with inherited similar duplications and ID)    |
| 63153      | 2          | F      | developmental delay, hypotonia, epilepsy, and strabismus                                                                                                       | duplication | 1p34.3          | hg18, chr1: 38974598-39179543   | 205       | 90                   | 168          | <i>GJA9, RRAGC, MYCBP, and RHBDL2</i>                             | MLPA/ paternally inherited                                         | N/A                                     | likely benign (there are three partially overlapping deletions and one duplication in DGV database)                                                                                                   |
| 62155      | 1          | M      | developmental delay, hypotonia, microcephaly, complex heart defect, short stature, and urether stenosis; follow-up clinical diagnosis of Coffin-Lowry syndrome | deletion    | 9p22.1          | hg18, chr9: 19379757-19555588   | 176       | N/A                  | 113          | <i>ASAH3L (ACER2), and SLC24A2</i>                                | MLPA/ maternally inherited                                         | negative                                | likely benign (pathogenic hemizygous 4 bp del in RPS6KA3 (RSK2): IVS10+4_+7delAGTA was found in this patient confirming the diagnosis of Coffin-Lowry syndrome)                                       |

|                            |           |         |                                                                                                                                          |                       |                        |                                 |     |     |     |                                                   |                                                  |          |                                                                                                                                                                                                                                                                       |
|----------------------------|-----------|---------|------------------------------------------------------------------------------------------------------------------------------------------|-----------------------|------------------------|---------------------------------|-----|-----|-----|---------------------------------------------------|--------------------------------------------------|----------|-----------------------------------------------------------------------------------------------------------------------------------------------------------------------------------------------------------------------------------------------------------------------|
|                            |           |         |                                                                                                                                          |                       |                        |                                 |     |     |     |                                                   |                                                  |          |                                                                                                                                                                                                                                                                       |
| 60245                      | 3         | F       | mild developmental delay, borderline short stature, and peripheral pulmonary stenosis                                                    | deletion              | 16q23.3                | hg18, chr16: 81560769-81736858  | 176 | 93  | 259 | <i>CDH13</i>                                      | MLPA/<br>maternally<br>inherited                 | N/A      | likely benign (pathogenic heterozygous mutation in PTPN11: c.922A>G (p.N308D) was found in this patient confirming the diagnosis of Noonan syndrome. There are two duplications and five deletions within <i>CDH13</i> (inherited or undefined) in Decipher database) |
| 55113                      | 18        | M       | ADHD, microcephaly, short stature, and myopia                                                                                            | deletion              | 3p14.1                 | hg18, chr3: 67592633-67762247   | 170 | 93  | 198 | <i>SUCLG2</i>                                     | MLPA/<br>maternally<br>inherited                 | negative | VOUS (there are patients 265229 with inherited intragenic deletion of <i>SUCLG2</i> and 259685 with inherited duplication of the whole gene in Decipher database presenting with different phenotypes)                                                                |
| 56761                      | 5         | M       | global developmental delay with prominent speech delay, and cryptorchidism                                                               | deletion              | Xq28 (pseudoautosomal) | hg18, chrX: 154686877-154843251 | 156 | N/A | 15  | <i>VAMP7</i>                                      | MLPA/<br>paternally<br>inherited                 | negative | likely benign (patient 272246 in Decipher database with similar inherited deletion, has an additional 10 Mb de novo deletion. <i>VAMP7</i> ( <i>synaptobrevin 1</i> ) has been associated with bipolar affective disorder) <sup>21</sup>                              |
| 54949                      | 7         | M       | global developmental delay, muscular hypotonia, ataxia intermittent strabismus convergens, mild thoracic scoliosis, and pes planovalgus, | deletion              | 6q26                   | hg18, chr6: 162072914-162156999 | 84  | 92  | 93  | <i>PARK2</i>                                      | array in<br>parents/<br>maternally<br>inherited  | N/A      | VOUS (CNVs of <i>PARK2</i> have been shown to be significantly enriched in ASD cases versus controls) <sup>21,22</sup>                                                                                                                                                |
| 50286 and 53032 (siblings) | 7.4 and 5 | F and M | developmental delay, hypotonia, cleft palate, growth failure, and genital abnormalities (details reported elsewhere) <sup>23</sup>       | deletion (homozygous) | 2p21                   | hg18, chr2: 44435674-44519612   | 83  | 99  | 93  | <i>PREPL</i> and <i>C2orf34</i> ( <i>CAMKMT</i> ) | MLPA/<br>parental                                | N/A      | pathogenic (overlapping Hypotonia Cystinuria- syndrome, described elsewhere) <sup>23</sup>                                                                                                                                                                            |
| 31553                      | 14        | M       | autistic features, motor problems, and macrocephaly                                                                                      | deletion              | 21q22.3                | hg18, chr21: 43169759-43201708  | 32  | 92  | 22  | <i>NDUFV3</i> , and <i>WDR4</i>                   | MLPA/<br>paternally<br>inherited                 | negative | VOUS (a de novo missense mutation of <i>WDR4</i> has been reported in an autism cohort using WES and mutations of <i>NDUFV3</i> have been reported in complex I deficiency) <sup>24,25</sup>                                                                          |
| 68738                      | 5         | M       | global developmental delay                                                                                                               | deletion              | 7q35                   | hg19, chr7: 144509480-144534911 | 25  | 93  | 35  | <i>TPK1</i>                                       | MLPA/<br>(absent in<br>the mother,<br>but father | negative | VOUS (this deletion was absent in the mother and a healthy sister but present in the                                                                                                                                                                                  |

|       |    |   |                                                                                                                        |                       |         |                                                                                                                                                                                                |    |    |    |                 |                               |          |                                                                                                                                                                                                                                                                         |
|-------|----|---|------------------------------------------------------------------------------------------------------------------------|-----------------------|---------|------------------------------------------------------------------------------------------------------------------------------------------------------------------------------------------------|----|----|----|-----------------|-------------------------------|----------|-------------------------------------------------------------------------------------------------------------------------------------------------------------------------------------------------------------------------------------------------------------------------|
|       |    |   |                                                                                                                        |                       |         |                                                                                                                                                                                                |    |    |    |                 | was N/A,<br>(likely paternal) |          | likewise affected sister. A de novo missense mutation of <i>TPK1</i> has been reported in an autism cohort using WES) <sup>24</sup>                                                                                                                                     |
| 62611 | 3  | F | developmental delay, muscular hypotonia, and epilepsy                                                                  | deletion              | 4q22.1  | hg18, chr4: 88438703-88452522                                                                                                                                                                  | 13 | 90 | 14 | <i>HSD17B13</i> | MLPA/<br>paternally inherited | N/A      | likely benign (heterozygous de novo mutation in <i>SCN2A</i> : c.4025T>C (p.L1342P) was found in this patient. There are DGV variations 30208 (2/485 ctls), 51479 (3/2026 ctls) and 36311 (1/1 ctl) with deletions encompassing some other exon(s) of <i>HSD17B13</i> ) |
| 58822 | 3  | M | mild developmental delay, microcephaly, growth deficiency, cryptorchidism, and bilateral inguinal and umbilical hernia | deletion              | 7q11.22 | hg18, chr7: 69233202-69240841                                                                                                                                                                  | 8  | 93 | 16 | <i>AUTS2</i>    | MLPA/<br>paternally inherited | negative | pathogenic (the father is similarly affected. Microdeletions of the gene in patients with variable neuro-developmental features have been reported) <sup>4</sup>                                                                                                        |
| 9229  | 27 | M | moderate intellectual disability, epilepsy, and abnormal behaviour                                                     | deletion (homozygous) | 1p36.31 | hg18, chr1: 6361008-6368114 (this position is intronic, however, the nearby exon 1 of <i>ACOT7</i> (isoform ENST00000377855) with no markers in the array was confirmed to be deleted by MLPA) | 7  | 98 | 8  | <i>ACOT7</i>    | MLPA/paternal                 | N/A      | likely pathogenic (segregation of the homozygous deletion, function of the gene, its expression pattern, and overlap with the KO mice phenotype are all in favour of its pathogenicity, however, further patients are needed)                                           |

\* Age at the time of array.

VOUS: variant of uncertain significance, N/A: not available, WES: whole-exome sequencing.

**Supplementary Table 3. SNPs of the affected genes in selected patients with inherited heterozygous candidate CNVs ≤ 500 kb detected by Sanger sequencing**

| Patient ID | Gender | Phenotype                                                                                                                                                         | Aberration | Genome coordinates              | Size (kb) | Affected gene(s)                           | Validation                    | Sanger sequencing of the affected genes                                                                                                                                                                                                                                                                                                                                                                                                | Pathogenicity                                                                                                                                                                                                             |
|------------|--------|-------------------------------------------------------------------------------------------------------------------------------------------------------------------|------------|---------------------------------|-----------|--------------------------------------------|-------------------------------|----------------------------------------------------------------------------------------------------------------------------------------------------------------------------------------------------------------------------------------------------------------------------------------------------------------------------------------------------------------------------------------------------------------------------------------|---------------------------------------------------------------------------------------------------------------------------------------------------------------------------------------------------------------------------|
| 48459      | M      | mild learning difficulties, motor problems, facial dysmorphic features, dilated cardiomyopathy, and anal atresia                                                  | deletion   | hg18, chr14: 78321869-78784675) | 462       | <i>NRXN3</i>                               | MLPA/<br>paternally inherited | 1 SNP:<br>c.669C>T (het), p.T 223T, rs1004212, MAF: 0.17                                                                                                                                                                                                                                                                                                                                                                               | likely pathogenic, reduced penetrance<br>(a mixture of inherited and de novo deletions within <i>NRXN3</i> has been reported in ASD)                                                                                      |
| 57028      | F      | developmental delay, sever speech delay, microcephaly, facial dysmorphic features, hallux valgus, and short stature                                               | deletion   | hg18, chr4: 98745657-99078956   | 333       | C4orf37 (STPG2)                            | MLPA/<br>paternally inherited | 8 SNPs:<br>c.-78T>C (het, 5'UTR), rs4699605, MAF: 0.30 (C)<br>c.222+18a>g (homo), rs13328005, MAF: 0.35 (g)<br>c.373T>C (homo), p.Y125H, rs17558193, MAF: 0.35 (C)<br>c.501-3a>g (homo), rs2903151, MAF:0.35 (g)<br>c.532A>G (homo), p.I178V, rs2903150, MAF: 0.35 (g)<br>c.557A>G (het), p.Y186C, rs28403003, MAF: 0.05 (G)<br>c.579A>G (homo), p.L193L, rs2865979, MAF: 0.35 (G)<br>c.1204+16c>t (het), rs202103504, MAF: < 0.01 (t) | VOUS<br>(there are patients 249670 (maternally inherited) similar to our patient and 256952 (inherited from normal parent) with seizure in Decipher database which have intragenic STPG2 deletions)                       |
| 53983      | M      | developmental delay, hypotonia, and strabismus                                                                                                                    | deletion   | hg18, chr7: 125890040-126149790 | 260       | <i>GRM8</i>                                | MLPA/<br>paternally inherited | 2 SNPs:<br>c.1018+14A>G (het), rs769199, MAF: 0.04 (A)<br>c.31T>C (het, 3' UTR), rs712723, MAF: 0.41                                                                                                                                                                                                                                                                                                                                   | likely pathogenic, reduced penetrance (several CNVs of <i>GRM8</i> have been reported in ADHD compared to controls)                                                                                                       |
| 62155      | M      | developmental delay, hypotonia, microcephaly, complex heart defect, short stature, and urether stenosis;<br>follow-up clinical diagnosis of Coffin-Lowry syndrome | deletion   | hg18, chr9: 19379757-19555588   | 176       | <i>ASAH3L (ACER2)</i> , and <i>SLC24A2</i> | MLPA/<br>maternally inherited | 2 SNPs in <i>SLC24A2</i> :<br>c.960A>G (het), p.P320P, rs4977308, MAF: 0.21 (A)<br>c.1201A>C (het), p.R401R, rs2383101, MAF: 0.15 (A)                                                                                                                                                                                                                                                                                                  | likely benign (pathogenic hemizygous 4 bp del in RPS6KA3 (RSK2): IVS10+4_+7delAGTA was found in this patient confirming the clinical diagnosis of Coffin-Lowry syndrome)                                                  |
| 55113      | M      | ADHD, microcephaly, short stature, and myopia                                                                                                                     | deletion   | hg18, chr3: 67592633-67762247   | 170       | <i>SUCLG2</i>                              | MLPA/<br>maternally inherited | 1 SNP:<br>c.45G>A (homo, 3' UTR), rs1065399, MAF: 0.32 (G)                                                                                                                                                                                                                                                                                                                                                                             | VOUS<br>(there are patients 265229 with inherited intragenic deletion of SUCLG2 and 259685 with inherited duplication of the whole gene in Decipher database presenting with different phenotypes)                        |
| 56761      | M      | global developmental delay with prominent speech delay, and cryptorchidism                                                                                        | deletion   | hg18, chrX: 154686877-154843251 | 156       | <i>VAMP7</i>                               | MLPA/<br>paternally inherited | 1 SNP:<br>c.595-10G>C (homo), rs143821247, MAF: 0.310                                                                                                                                                                                                                                                                                                                                                                                  | likely benign (patient 272246 in Decipher database with similar inherited deletion, has an additional 10Mb de novo deletion. <i>VAMP7</i> ( <i>synaptobrevin 1</i> ) has been associated with bipolar affective disorder) |

|       |   |                                                                                                                        |          |                                 |    |                                 |                                                                       |                                                                                                                                                                              |                                                                                                                                                                                                               |
|-------|---|------------------------------------------------------------------------------------------------------------------------|----------|---------------------------------|----|---------------------------------|-----------------------------------------------------------------------|------------------------------------------------------------------------------------------------------------------------------------------------------------------------------|---------------------------------------------------------------------------------------------------------------------------------------------------------------------------------------------------------------|
| 31553 | M | autistic features, motor problems, and macrocephaly                                                                    | deletion | hg18, chr21: 43169759-43201708  | 32 | <i>NDUFV3</i> , and <i>WDR4</i> | MLPA/<br>paternally inherited                                         | 3 SNPs in <i>WDR4</i> :<br>c.213G>C (het), p.K71N, rs2248490, MAF: 0.494 (G)<br>c.796C>T (het), p.P266S, rs15736, MAF: 0.35<br>c.1169G>A (het), p.R390Q, rs6586250, MAF: 0.2 | VOUS<br>(a de novo missense mutation of <i>WDR4</i> has been reported in an autism cohort using WES and mutations of <i>NDUFV3</i> have been reported in complex I deficiency)                                |
| 68738 | M | global developmental delay                                                                                             | deletion | hg19, chr7: 144509480-144534911 | 25 | <i>TPK1</i>                     | MLPA/<br>(absent in the mother, but father was N/A, (likely paternal) | -                                                                                                                                                                            | VOUS<br>(this deletion was absent in the mother and a healthy sister but present in the likewise affected sister. A de novo missense mutation of <i>TPK1</i> has been reported in an autism cohort using WES) |
| 58822 | M | mild developmental delay, microcephaly, growth deficiency, cryptorchidism, and bilateral inguinal and umbilical hernia | deletion | hg18, chr7: 69233202-69240841   | 8  | <i>AUTS2</i>                    | MLPA/<br>paternally inherited                                         | 1 silent variant:<br>c.1158C>T (het), p.S386S                                                                                                                                | pathogenic<br>(the father is similarly affected. Microdeletions of the gene in patients with variable neurodevelopmental features have been reported)                                                         |
| 60984 | F | developmental delay, growth hormone deficiency, left hypoplastic kidney, and celiac disease                            | deletion | hg18, chr16: 24793142-24797112  | 3  | <i>SLC5A11</i>                  | MLPA/<br>maternally inherited                                         | 1 SNP:<br>c.669T>C (homo), p.F223F, rs274081, MAF: <0.01 (T)                                                                                                                 | no evidence<br>(many members of Solute Carrier Family are involved in genetic disorders)                                                                                                                      |

## References

1. Sultana R, Yu CE, Yu J, Munson J, Chen D, Hua W, Estes A, Cortes F, de la Barra F, Yu D, Haider ST, Trask BJ, Green ED, Raskind WH, Disteché CM, Wijsman E, Dawson G, Storm DR, Schellenberg GD, Villacres EC. Identification of a novel gene on chromosome 7q11.2 interrupted by a translocation breakpoint in a pair of autistic twins. *Genomics* 2002;80(2):129-34.
2. Bedogni F, Hodge RD, Nelson BR, Frederick EA, Shiba N, Daza RA, Hevner RF. Autism susceptibility candidate 2 (Aut2) encodes a nuclear protein expressed in developing brain regions implicated in autism neuropathology. *Gene Expr Patterns* 2010;10(1):9-15.
3. Oksenberg N, Ahituv N. The role of AUTS2 in neurodevelopment and human evolution. *Trends Genet* 2013;29(10):600-8.
4. Beunders G, Voorhoeve E, Golzio C, Pardo LM, Rosenfeld JA, Talkowski ME, Simonic I, Lionel AC, Vergult S, Pyatt RE, van de Kamp J, Nieuwint A, Weiss MM, Rizzu P, Verwer LE, van Spaendonck RM, Shen Y, Wu BL, Yu T, Yu Y, Chiang C, Gusella JF, Lindgren AM, Morton CC, van Binsbergen E, Bulk S, van Rossem E, Vanakker O, Armstrong R, Park SM, Greenhalgh L, Maye U, Neill NJ, Abbott KM, Sell S, Ladda R, Farber DM, Bader PI, Cushing T, Drautz JM, Konczal L, Nash P, de Los Reyes E, Carter MT, Hopkins E, Marshall CR, Osborne LR, Gripp KW, Thrush DL, Hashimoto S, Gastier-Foster JM, Astbury C, Ylstra B, Meijers-Heijboer H, Posthuma D, Menten B, Mortier G, Scherer SW, Eichler EE, Girirajan S, Katsanis N, Groffen AJ, Sistermans EA. Exonic deletions in AUTS2 cause a syndromic form of intellectual disability and suggest a critical role for the C terminus. *Am J Hum Genet* 2013;92(2):210-20.
5. Nagamani SC, Erez A, Ben-Zeev B, Frydman M, Winter S, Zeller R, El-Khechen D, Escobar L, Stankiewicz P, Patel A, Cheung SW. Detection of copy-number variation in AUTS2 gene by targeted exonic array CGH in patients with developmental delay and autistic spectrum disorders. *Eur J Hum Genet* 2013;21(3):343-6.
6. Jolley A, Corbett M, McGregor L, Waters W, Brown S, Nicholl J, Yu S. De novo intragenic deletion of the autism susceptibility candidate 2 (AUTS2) gene in a patient with developmental delay: a case report and literature review. *Am J Med Genet A* 2013;161(6):1508-12.
7. Dinkel H, Michael S, Weatheritt RJ, Davey NE, Van Roey K, Altenberg B, Toedt G, Uyar B, Seiler M, Budd A, Jodicke L, Dammert MA, Schroeter C, Hammer M, Schmidt T, Jehl P, McGuigan C, Dymecka M, Chica C, Luck K, Via A, Chatr-Aryamontri A, Haslam N, Grebnev G, Edwards RJ, Steinmetz MO, Meiselbach H, Diella F, Gibson TJ. ELM--the database of eukaryotic linear motifs. *Nucleic Acids Res* 2012;40(Database issue):D242-51.
8. Blom N, Sicheritz-Ponten T, Gupta R, Gammeltoft S, Brunak S. Prediction of post-translational glycosylation and phosphorylation of proteins from the amino acid sequence. *Proteomics* 2004;4(6):1633-49.
9. Roach PJ. Multisite and hierarchical protein phosphorylation. *J Biol Chem* 1991;266(22):14139-42.

10. Remy G, Risco AM, Inesta-Vaquera FA, Gonzalez-Teran B, Sabio G, Davis RJ, Cuenda A. Differential activation of p38MAPK isoforms by MKK6 and MKK3. *Cell Signal* 2010;22(4):660-7.
11. Weiss LA, Shen Y, Korn JM, Arking DE, Miller DT, Fossdal R, Saemundsen E, Stefansson H, Ferreira MA, Green T, Platt OS, Ruderfer DM, Walsh CA, Altshuler D, Chakravarti A, Tanzi RE, Stefansson K, Santangelo SL, Gusella JF, Sklar P, Wu BL, Daly MJ. Association between microdeletion and microduplication at 16p11.2 and autism. *N Engl J Med* 2008;358(7):667-75.
12. Shinawi M, Liu P, Kang SH, Shen J, Belmont JW, Scott DA, Probst FJ, Craigen WJ, Graham BH, Pursley A, Clark G, Lee J, Proud M, Stocco A, Rodriguez DL, Kozel BA, Sparagana S, Roeder ER, McGrew SG, Kurczynski TW, Allison LJ, Amato S, Savage S, Patel A, Stankiewicz P, Beaudet AL, Cheung SW, Lupski JR. Recurrent reciprocal 16p11.2 rearrangements associated with global developmental delay, behavioural problems, dysmorphism, epilepsy, and abnormal head size. *J Med Genet* 2010;47(5):332-41.
13. Missler M, Zhang W, Rohlmann A, Kattenstroth G, Hammer RE, Gottmann K, Sudhof TC. Alpha-neurexins couple Ca<sup>2+</sup> channels to synaptic vesicle exocytosis. *Nature* 2003;423(6943):939-48.
14. Vaags AK, Lionel AC, Sato D, Goodenberger M, Stein QP, Curran S, Ogilvie C, Ahn JW, Drmic I, Senman L, Chrysler C, Thompson A, Russell C, Prasad A, Walker S, Pinto D, Marshall CR, Stavropoulos DJ, Zwaigenbaum L, Fernandez BA, Fombonne E, Bolton PF, Collier DA, Hodge JC, Roberts W, Szatmari P, Scherer SW. Rare deletions at the neurexin 3 locus in autism spectrum disorder. *Am J Hum Genet* 2012;90(1):133-41.
15. Malherbe P, Kratzeisen C, Lundstrom K, Richards JG, Faull RL, Mutel V. Cloning and functional expression of alternative spliced variants of the human metabotropic glutamate receptor 8. *Brain Res Mol Brain Res* 1999;67(2):201-10.
16. Elia J, Glessner JT, Wang K, Takahashi N, Shtir CJ, Hadley D, Sleiman PM, Zhang H, Kim CE, Robison R, Lyon GJ, Flory JH, Bradfield JP, Imielinski M, Hou C, Frackelton EC, Chiavacci RM, Sakurai T, Rabin C, Middleton FA, Thomas KA, Garris M, Mentch F, Freitag CM, Steinhausen HC, Todorov AA, Reif A, Rothenberger A, Franke B, Mick EO, Roeyers H, Buitelaar J, Lesch KP, Banaschewski T, Ebstein RP, Mulas F, Oades RD, Sergeant J, Sonuga-Barke E, Renner TJ, Romanos M, Romanos J, Warnke A, Walitza S, Meyer J, Palmason H, Seitz C, Loo SK, Smalley SL, Biederman J, Kent L, Asherson P, Anney RJ, Gaynor JW, Shaw P, Devoto M, White PS, Grant SF, Buxbaum JD, Rapoport JL, Williams NM, Nelson SF, Faraone SV, Hakonarson H. Genome-wide copy number variation study associates metabotropic glutamate receptor gene networks with attention deficit hyperactivity disorder. *Nat Genet* 2012;44(1):78-84.
17. Prasad A, Merico D, Thiruvahindrapuram B, Wei J, Lionel AC, Sato D, Rickaby J, Lu C, Szatmari P, Roberts W, Fernandez BA, Marshall CR, Hatchwell E, Eis PS, Scherer SW. A discovery resource of rare copy number variations in individuals with autism spectrum disorder. *G3 (Bethesda)* 2012;2(12):1665-85.
18. Shaikh TH, Gai X, Perin JC, Glessner JT, Xie H, Murphy K, O'Hara R, Casalunovo T, Conlin LK, D'Arcy M, Frackelton EC, Geiger EA, Haldeman-Englert C, Imielinski M, Kim CE, Medne L, Annaiah K, Bradfield JP, Dabaghyan E, Eckert A, Onyiah CC, Ostapenko S,

Otieno FG, Santa E, Shaner JL, Skraban R, Smith RM, Elia J, Goldmuntz E, Spinner NB, Zackai EH, Chiavacci RM, Grundmeier R, Rappaport EF, Grant SF, White PS, Hakonarson H. High-resolution mapping and analysis of copy number variations in the human genome: a data resource for clinical and research applications. *Genome Res* 2009;19(9):1682-90.

19. Fernandez BA, Roberts W, Chung B, Weksberg R, Meyn S, Szatmari P, Joseph-George AM, Mackay S, Whitten K, Noble B, Vardy C, Crosbie V, Luscombe S, Tucker E, Turner L, Marshall CR, Scherer SW. Phenotypic spectrum associated with de novo and inherited deletions and duplications at 16p11.2 in individuals ascertained for diagnosis of autism spectrum disorder. *J Med Genet* 2010;47(3):195-203.

20. Muller DJ, Schulze TG, Jahnes E, Cichon S, Krauss H, Kesper K, Held T, Maier W, Propping P, Nothen MM, Rietschel M. Association between a polymorphism in the pseudoautosomal X-linked gene SYBL1 and bipolar affective disorder. *Am J Med Genet* 2002;114(1):74-8.

21. Glessner JT, Wang K, Cai G, Korvatska O, Kim CE, Wood S, Zhang H, Estes A, Brune CW, Bradfield JP, Imielinski M, Frackelton EC, Reichert J, Crawford EL, Munson J, Sleiman PM, Chiavacci R, Annaiah K, Thomas K, Hou C, Glaberson W, Flory J, Otieno F, Garris M, Soorya L, Klei L, Piven J, Meyer KJ, Anagnostou E, Sakurai T, Game RM, Rudd DS, Zurawiecki D, McDougle CJ, Davis LK, Miller J, Posey DJ, Michaels S, Kolevzon A, Silverman JM, Bernier R, Levy SE, Schultz RT, Dawson G, Owley T, McMahon WM, Wassink TH, Sweeney JA, Nurnberger JI, Coon H, Sutcliffe JS, Minshew NJ, Grant SF, Bucan M, Cook EH, Buxbaum JD, Devlin B, Schellenberg GD, Hakonarson H. Autism genome-wide copy number variation reveals ubiquitin and neuronal genes. *Nature* 2009;459(7246):569-73.

22. Girirajan S, Dennis MY, Baker C, Malig M, Coe BP, Campbell CD, Mark K, Vu TH, Alkan C, Cheng Z, Biesecker LG, Bernier R, Eichler EE. Refinement and discovery of new hotspots of copy-number variation associated with autism spectrum disorder. *Am J Hum Genet* 2013;92(2):221-37.

23. Bartholdi D, Asadollahi R, Oneda B, Schmitt-Mechelke T, Tonella P, Baumer A, Rauch A. Further delineation of genotype-phenotype correlation in homozygous 2p21 deletion syndromes: first description of patients without cystinuria. *Am J Med Genet A* 2013;161A(8):1853-9.

24. Sanders SJ, Murtha MT, Gupta AR, Murdoch JD, Raubeson MJ, Willsey AJ, Ercan-Sencicek AG, DiLullo NM, Parikshak NN, Stein JL, Walker MF, Ober GT, Teran NA, Song Y, El-Fishawy P, Murtha RC, Choi M, Overton JD, Bjornson RD, Carriero NJ, Meyer KA, Bilguvar K, Mane SM, Sestan N, Lifton RP, Gunel M, Roeder K, Geschwind DH, Devlin B, State MW. De novo mutations revealed by whole-exome sequencing are strongly associated with autism. *Nature* 2012;485(7397):237-41.

25. Calvo SE, Tucker EJ, Compton AG, Kirby DM, Crawford G, Burt NP, Rivas M, Guiducci C, Bruno DL, Goldberger OA, Redman MC, Wiltshire E, Wilson CJ, Altshuler D, Gabriel SB, Daly MJ, Thorburn DR, Mootha VK. High-throughput, pooled sequencing identifies mutations in NUBPL and FOXRED1 in human complex I deficiency. *Nat Genet* 2010;42(10):851-8.
